# Supplementary material for: Amplitude-integrated electroencephalography improves the predictive ability of acute bilirubin encephalopathy
Source: PubMed Central journal article supplement — Transl Pediatr. 2021 Mar;10(3):647–56. doi: 10.21037/tp-21-35 (PMC8041610; doi:10.21037/tp-21-35), 2021-03
Supplement: tp-10-03-647-dss.pdf [file tp-10-03-647-dss.pdf]

## Data Sharing Statement

|                     |                                                                                                                                                     |                                                                                                                               |
|---------------------|-----------------------------------------------------------------------------------------------------------------------------------------------------|-------------------------------------------------------------------------------------------------------------------------------|
| <b>Article Info</b> | <a href="http://dx.doi.org/10.21037/tp-21-35">http://dx.doi.org/10.21037/tp-21-35</a>                                                               |                                                                                                                               |
| <b>Item</b>         | <b>Question</b>                                                                                                                                     | <b>Authors' Response<br/>(place "-" if not applicable)</b>                                                                    |
| 1                   | Would you like to share data collected for your study to others?                                                                                    | Yes.                                                                                                                          |
| 2                   | If not, would you like to share the reason for your decision?                                                                                       | -                                                                                                                             |
| 3                   | What data in particular will be shared?                                                                                                             | AEEG figures in particular will be shared, as well as other clinical information such as B/A value and etc.                   |
| 4                   | Any other documents will be shared? Such as study protocol, statistical analysis plan, informed consent form, clinical study report, analytic code. | Study protocol, statistical analysis plan will also be shared if requested.                                                   |
| 5                   | When will data availability begin?                                                                                                                  | From the publication date.                                                                                                    |
| 6                   | When will data availability end?                                                                                                                    | Two years within the publication date, since the aEEG technique and machine may be updated over time.                         |
| 7                   | To whom will you share the data?                                                                                                                    | Pediatricians or neurologists who are interested in aEEG or ABE.                                                              |
| 8                   | For what type of analysis or purpose?                                                                                                               | For analysis of how can aEEG predicts ABE or hyperbilirubinemia.                                                              |
| 9                   | How or where can the data/documents be obtained?                                                                                                    | Emails could be sent to the address below to obtain the shared data:<br>Email: 13801247561@163.com                            |
| 10                  | Any other restrictions?                                                                                                                             | We may balance and assess the potential benefits and risks when data was requested and provide the data that could be shared. |
